# Supplementary material for: Alternation of plasma fatty acids composition and desaturase activities in children with liver steatosis
Source: PLoS One. 2017 Jul 31;12(7):e0182277. doi: 10.1371/journal.pone.0182277 (PMC5536264; doi:10.1371/journal.pone.0182277)
Supplement: S1 File — (XLS) [file pone.0182277.s001.xls]

## Sheet: 工作表1
			Fatty Acid		%									ug/ml									%								ug/ml								%								ug/ml
編號	NAFLD score	high and low grade	ug/ml		C14:0	C16:0	C17:0	C18:0	C20:0	C22:0	C24:0	sat		C14:0	C16:0	C17:0	C18:0	C20:0	C22:0	C24:0	sat		C14:1	C16:1n-7	C18:1n-9	C18:1n-7	C20:1n-9	C24:1n-9	mono		C14:1	C16:1n-7	C18:1n-9	C18:1n-7	C20:1n-9	C24:1n-9	mono		C18:2n-6	C18:3n-6	C20:3n-6	C20:4n-6	C22:4n-6	C22:5n-6	n-6		C18:2n-6	C18:3n-6	C20:3n-6
Case 1	5	2	2364.65		0.5189	22.6099	0.2252	8.0639	0.2554	0.8632	0.528	33.0645		12.2701	534.644	5.3244	190.682	6.0399	20.4127	12.4861	781.859		0.1209	1.1663	14.8009	1.1174	0.1159	0.9941	18.3154		2.8584	27.5788	349.988	26.4237	2.7395	23.5072	433.096		34.6578	0.4492	1.6552	7.5301	0.2689	0.1634	44.7246		819.537	10.6209	39.1395
Case 2	6	2	3649.44		0.563	22.6262	0.2868	8.3546	0.2914	0.7827	0.6267	33.5313		20.5452	825.729	10.4651	304.895	10.6357	28.5659	22.8695	1223.71		0.1488	1.4746	16.6221	1.5307	0.1728	1.5182	21.4674		5.4307	53.8145	606.614	55.8636	6.308	55.4076	783.438		31.8218	0.3294	1.4487	6.956	0.1726	0.1136	40.8421		1161.32	12.0222	52.868
Case 3	5	2	3099.75		0.5944	25.0518	0.3695	12.5775	0.5814	1.9218	1.3799	42.4763		18.4237	776.542	11.4529	389.87	18.0233	59.5721	42.7732	1316.66		0.1796	1.1082	14.4795	1.1934	0.1833	2.0875	19.2315		5.5674	34.3522	448.828	36.9925	5.6803	64.7073	596.128		24.2002	0.242	1.4101	5.5069	0.2827	0.1173	31.7593		750.145	7.5013	43.711
Case 4	1	1	2561.17		0.2944	22.5032	0.2086	8.1719	0.292	0.7617	0.6199	32.8517		7.5389	576.344	5.3417	209.297	7.4777	19.5087	15.8777	841.386		0.0976	1.0076	13.6936	1.4038	0.0259	1.5813	17.8098		2.5004	25.805	350.716	35.9548	0.663	40.4994	456.139		34.243	0.1973	0.9037	8.8691	0.1867	0.1506	44.5503		877.02	5.0526	23.1455
Case 5	0	0	2417.6		0.451	21.7435	0.225	9.0473	0.2898	1.0055	0.9317	33.6938		10.904	525.669	5.4388	218.727	7.0072	24.309	22.5236	814.579		0.1128	0.9775	13.7977	1.3056	0.1132	1.3704	17.6773		2.7274	23.6321	333.574	31.5639	2.7368	33.131	427.365		35.5811	0.1748	1.1835	7.146	0.2354	0.1901	44.511		860.208	4.2261	28.6127
Case 6			2932.64		0.6314	22.4938	0.1848	8.1744	0.2006	0.8547	0.6951	33.2349		18.516	659.663	5.4193	239.726	5.8843	25.0654	20.3857	974.66		0.0935	1.6692	17.4276	1.3536	0.0881	0.9676	21.5996		2.7415	48.9521	511.087	39.6954	2.5845	28.3772	633.438		32.129	0.666	2.0671	6.2361	0.2304	0.1746	41.5033		942.227	19.5318	60.6216
Case 7	0	0	3544.02		0.1845	24.0373	0.1804	13.4324	0.6051	1.6581	1.5865	41.6842		6.54	851.888	6.3919	476.047	21.4434	58.7624	56.2258	1477.3		0.0734	1.323	15.5307	1.6892	0.0845	3.3575	22.0583		2.6005	46.8877	550.41	59.8663	2.9945	118.992	781.751		25.0387	0.0345	1.0508	5.4866	0.1757	0.0745	31.8607		887.378	1.2214	37.2397
Case 8	0	0	2624.74		0.4541	21.3457	0.2117	7.6837	0.2633	0.887	0.7708	31.6161		11.919	560.269	5.5555	201.677	6.9096	23.2817	20.2308	829.842		0.11	0.8105	14.2052	1.2662	0.112	1.1963	17.7001		2.8867	21.2728	372.849	33.2345	2.9384	31.3996	464.581		38.2668	0.1936	1.0661	7.5401	0.1909	0.1524	47.4099		1004.4	5.0822	27.9813
Case 9			1864.41		0.2751	22.0526	0.2028	6.828	0.3361	0.8579	0.7193	31.2717		5.129	411.151	3.7802	127.302	6.2662	15.9944	13.4101	583.034		0.1011	1.139	14.8706	1.7354	0.1261	1.7545	19.7265		1.8843	21.235	277.248	32.3549	2.3506	32.7109	367.784		36.2482	0.2672	0.9154	6.5169	0.1689	0.1012	44.2179		675.815	4.9824	17.0674
Case 10			3089.19		0.6687	21.4209	0.2269	8.1323	0.3362	0.9339	0.6768	32.3956		20.6568	661.733	7.0088	251.223	10.3845	28.8502	20.9075	1000.76		0.152	1.4988	13.8556	1.3922	0.0834	1.4752	18.4571		4.6946	46.3018	428.026	43.0078	2.575	45.5703	570.176		32.2044	0.3573	1.1997	10.2874	0.2229	0.1499	44.4215		994.855	11.0366	37.0606
Case 11	0	0	2268.38		0.2212	20.5506	0.242	8.1451	0.2423	0.8862	0.7585	31.0459		5.0184	466.165	5.4885	184.762	5.4956	20.1032	17.205	704.238		0.0926	0.8819	11.1453	1.2669	0.0699	1.1642	14.6208		2.1006	20.0055	252.817	28.7381	1.5858	26.4088	331.656		41.1804	0.1304	0.6676	5.9324	0.1015	0.1265	48.1388		934.128	2.9584	15.1436
Case 12	0	0	2575.84		0.5746	21.4974	0.2178	7.96	0.2826	0.9693	0.8391	32.3409		14.8019	553.74	5.61	205.037	7.2793	24.967	21.6138	833.049		0.1134	0.9787	14.947	1.2919	0.1169	1.2516	18.6994		2.9202	25.2086	385.012	33.2769	3.0107	32.2393	481.667		37.741	0.2115	1.342	5.6777	0.1435	0.1345	45.2502		972.148	5.4477	34.5687
Case 13	0	0	2475.92		0.4516	20.696	0.2028	7.2763	0.2626	0.8609	0.7955	30.5457		11.1808	512.417	5.0213	180.155	6.5011	21.3162	19.6957	756.286		0.1168	1.5205	16.9395	1.6293	0.0991	1.1771	21.4823		2.891	37.6456	419.409	40.3413	2.4534	29.144	531.885		36.7863	0.2278	0.8664	6.2156	0.1735	0.1678	44.4375		910.8	5.6409	21.4514
Case 14	0	0	1795.15		0.4887	24.9356	0.2333	9.607	0.3403	1.0903	0.6109	37.3062		8.7728	447.632	4.1883	172.461	6.109	19.5717	10.9669	669.701		0.0125	1.0341	16.4002	1.2488	0.091	1.3242	20.1107		0.2238	18.5631	294.407	22.4173	1.6338	23.7719	361.017		34.1699	0.0436	1.0308	3.8545	0.2045	0.0898	39.3931		613.401	0.7833	18.5041
Case 15	0	0	2211.21		0.4971	23.7861	0.3191	9.5052	0.316	0.988	1.1042	36.5158		10.9926	525.961	7.0568	210.179	6.9875	21.8473	24.417	807.44		0.1895	1.2489	14.46	1.3079	0.0565	1.6969	18.9598		4.1892	27.6151	319.741	28.9214	1.2503	37.5223	419.24		34.3194	0.1444	0.8235	5.7759	0.1771	0.1238	41.3641		758.873	3.1933	18.2099
Case 16	0	0	2618.33		0.6571	21.6383	0.1973	7.1719	0.2347	0.7895	0.6487	31.3375		17.2062	566.563	5.1655	187.783	6.1453	20.6723	16.9847	820.521		0.1047	1.3868	16.8393	1.3374	0.0981	1.0591	20.8253		2.7401	36.3106	440.908	35.0163	2.5695	27.7307	545.275		36.2178	0.1058	1.4518	6.3221	0.1944	0.109	44.401		948.303	2.7699	38.0137
Case 17	0	0	2407.24		0.9232	22.9567	0.2193	7.6562	0.2885	1.0093	0.6073	33.6604		22.2235	552.624	5.2796	184.302	6.9441	24.2959	14.6194	810.289		0.1447	1.8438	16.8888	1.2535	0.1089	1.2661	21.5058		3.4827	44.3846	406.555	30.1736	2.6226	30.4786	517.697		30.7158	0.1313	1.554	7.0474	0.2181	0.2318	39.8985		739.405	3.161	37.4085
Case 18			2174.38		0.4323	23.2469	0.2158	9.434	0.4121	1.2027	0.9257	35.8695		9.3991	505.475	4.6928	205.131	8.9598	26.1521	20.129	779.939		0.0773	1.0284	13.0693	1.1479	0.0473	1.8623	17.2326		1.6798	22.3615	284.175	24.9606	1.0293	40.4943	374.701		27.8472	0.2774	1.6786	10.3444	0.2628	0.254	40.6644		605.503	6.0309	36.4997
Case 19	0	0	2138.76		0.474	21.3693	0.2721	9.6447	0.3621	0.9517	0.7482	33.8222		10.1376	457.037	5.82	206.277	7.745	20.3551	16.0024	723.374		0.1461	0.8742	11.9326	1.2057	0.0559	1.5916	15.8062		3.1245	18.6977	255.208	25.7878	1.1963	34.0413	338.056		36.0849	0.3487	1.2873	8.171	0.1743	0.1228	46.1889		771.767	7.4574	27.5314
Case 20	0	0	2307.48		0.4353	21.6378	0.2103	7.7161	0.2873	0.7986	0.5292	31.6146		10.0447	499.288	4.8523	178.047	6.6297	18.4264	12.2119	729.5		0.113	1.0122	14.9197	1.2473	0.1102	1.1352	18.5375		2.6071	23.3561	344.267	28.7811	2.5417	26.1938	427.747		36.6866	0.1237	1.0893	7.0979	0.2193	0.1371	45.3539		846.535	2.8544	25.1351
Case 21	0	0	3174.9		0.4956	21.0649	0.2486	8.8491	0.3554	0.9851	0.6673	32.6659		15.7332	668.789	7.8921	280.951	11.2827	31.275	21.1865	1037.11		0.1271	1.0083	12.4779	1.1565	0.0685	1.3051	16.1433		4.0337	32.0111	396.16	36.7167	2.1749	41.4356	512.532		37.7808	0.1807	1.1698	7.812	0.2288	0.1882	47.3602		1199.5	5.7361	37.1406
Case 22			2063.22		0.3442	21.3112	0.1843	7.6557	0.2514	0.8278	0.6408	31.2155		7.1023	439.696	3.8025	157.954	5.1879	17.0789	13.2216	644.043		0.0641	1.3454	14.5353	1.4579	0.0941	1.3758	18.8726		1.3222	27.7586	299.895	30.0806	1.9411	28.3855	389.383		36.8424	0.1779	0.9495	6.8151	0.1832	0.1171	45.0852		760.139	3.6695	19.5892
Case 23	0	0	2076.75		0.2942	24.2499	0.198	7.7388	0.295	0.8693	0.4084	34.0535		6.1093	503.611	4.1127	160.716	6.1258	18.0522	8.481	707.208		0.0675	1.2251	18.3609	1.4692	0.1575	1.5265	22.8069		1.4023	25.4431	381.31	30.5126	3.2715	31.7023	473.642		33.5834	0.0197	0.6125	5.5021	0.1875	0.1411	40.0464		697.443	0.4087	12.7202
Case 24	0	0	3051.94		0.6518	24.6088	0.3231	12.8068	0.4576	1.0878	1.5033	41.4392		19.8932	751.046	9.86	390.856	13.965	33.1986	45.8795	1264.7		0.1339	0.8307	12.9844	1.3713	0.093	2.0388	17.4521		4.0851	25.3515	396.276	41.8509	2.8388	62.2241	532.626		27.5146	0.0376	1.0842	6.2584	0.2443	0.0857	35.2248		839.73	1.147	33.0888
Case 25	0	0	1702.13		1.0349	27.3314	0.2426	13.6969	0.4194	1.2807	0.7962	44.8019		17.6148	465.214	4.1298	233.138	7.138	21.799	13.5516	762.585		0.1106	0.5946	11.7514	1.0914	0.0442	1.9462	15.5384		1.8822	10.1213	200.024	18.577	0.7529	33.126	264.483		28.0941	0.0855	1.1223	6.1282	0.0516	0.1091	35.5908		478.196	1.4555	19.103
Case 26	4	2	2270.02		0.3211	22.508	0.1783	7.3989	0.2996	0.9731	0.5076	32.1866		7.2889	510.935	4.0467	167.955	6.8002	22.0905	11.5228	730.64		0.0696	1.0322	15.2742	1.2906	0.0624	1.1665	18.8954		1.5794	23.4307	346.727	29.296	1.4163	26.4803	428.929		36.6202	0.2104	1.3843	6.3077	0.2186	0.1552	44.8964		831.284	4.7767	31.4241
Case 27	0	0	1914.09		0.2984	20.7622	0.2633	8.5258	0.3	0.6529	0.6607	31.4633		5.7117	397.407	5.0394	163.191	5.7414	12.4966	12.6468	602.234		0.1132	0.9439	14.1991	1.6526	0.0561	1.3057	18.2706		2.1673	18.0677	271.782	31.6314	1.0741	24.9918	349.715		37.5198	0.1702	0.9762	6.7413	0.1086	0.1267	45.6428		718.161	3.2577	18.6845
Case 28	1	1	4095.35		0.3072	21.9685	0.3041	9.2798	0.2801	0.8664	1.0386	34.0447		12.5813	899.688	12.4559	380.039	11.4709	35.4805	42.5341	1394.25		0.0868	0.9522	13.2192	1.2372	0.046	1.3808	16.9222		3.5535	38.9978	541.374	50.6663	1.8844	56.5496	693.026		35.7621	0.1315	1.2798	6.3348	0.1446	0.0736	43.7264		1464.58	5.3841	52.411
Case 29	0	0	3227.8		0.4909	26.1883	0.4684	19.1105	0.4609	1.1783	1.0286	48.9259		15.8453	845.304	15.1191	616.847	14.8785	38.032	33.2017	1579.23		0.1713	0.6104	10.1615	0.9237	0.141	1.6928	13.7008		5.529	19.7039	327.993	29.8147	4.5512	54.6414	442.233		25.2658	0.1983	1.6332	6.6346	0.4565	0.175	34.3634		815.53	6.4021	52.7151
Case 30	0	0	2420.93		0.319	21.2502	0.1437	7.1701	0.2857	0.8715	0.4706	30.5108		7.7229	514.452	3.4788	173.584	6.9172	21.0982	11.3929	738.646		0.0763	0.9377	13.0422	1.1413	0.0411	0.8207	16.0593		1.8471	22.7008	315.743	27.6299	0.9955	19.8692	388.785		45.0805	0.1695	0.7126	4.3595	0.175	0.159	50.6561		1091.37	4.1043	17.2525
Case 31	0	0	2711.25		1.1253	24.2688	0.3115	6.5573	0.2254	0.5589	0.3319	33.379		30.5089	657.989	8.4442	177.786	6.1101	15.1528	8.9978	904.988		0.2328	2.524	18.4799	1.7459	0.1351	1.038	24.1557		6.3114	68.4323	501.037	47.3348	3.664	28.1422	654.922		33.4756	0.1625	0.7629	4.0934	0.0947	0.0892	38.6782		907.606	4.4048	20.6833
Case 32	0	0	2292.77		0.2279	22.314	0.153	7.4777	0.3529	1.2633	0.7606	32.5493		5.2245	511.608	3.5069	171.446	8.0916	28.9648	17.4377	746.279		0.0419	0.8451	17.1196	1.2057	0.1145	1.6186	20.9453		0.9598	19.3754	392.512	27.6442	2.6245	37.1103	480.226		35.5397	0.0314	0.7215	6.6138	0.1767	0.1365	43.2195		814.842	0.7195	16.5424
Case 33	2	1	3081.58		0.8021	22.7012	0.1996	7.9904	0.2732	0.7793	0.4873	33.233		24.7173	699.555	6.1504	246.23	8.4188	24.0133	15.0162	1024.1		0.1502	1.7756	18.4127	1.3982	0.0713	1.4501	23.2582		4.6281	54.7175	567.404	43.0866	2.1975	44.686	716.719		33.0626	0.3506	1.6413	5.3098	0.1989	0.1769	40.7402		1018.85	10.8044	50.5767
Case 34	0	0	1906.61		0.4191	23.2722	0.2188	8.116	0.2755	0.8362	0.7456	33.8834		7.9899	443.711	4.1725	154.74	5.2532	15.9437	14.216	646.026		0.1262	1.1312	14.917	1.2924	0.0596	1.343	18.8695		2.4063	21.5675	284.411	24.6407	1.1373	25.6066	359.769		33.2651	0.5607	1.5092	8.0343	0.2863	0.1909	43.8464		634.237	10.6904	28.7744
Case 35	0	0	3423.26		0.6162	23.3389	0.3435	9.277	0.2504	0.7885	0.6348	35.2494		21.0925	798.95	11.7586	317.577	8.5728	26.994	21.7322	1206.68		0.1912	1.289	14.8048	1.3246	0.0912	1.3703	19.071		6.544	44.1247	506.807	45.3433	3.1219	46.9089	652.85		34.58	0.2309	1.0693	6.2972	0.1478	0.1404	42.4655		1183.76	7.904	36.6045
Case 36	0	0	3131.98		0.7222	22.8407	0.2206	8.9735	0.2868	0.7262	0.5421	34.3121		22.6183	715.368	6.9087	281.05	8.9818	22.7453	16.9782	1074.65		0.1118	0.9336	15.8723	1.3251	0.0713	1.1481	19.4622		3.5015	29.2409	497.118	41.5004	2.234	35.9573	609.553		33.2434	0.0214	0.8821	7.2355	0.214	0.2514	41.8477		1041.18	0.6702	27.6271
Case 37	0	0	2394.32		0.4124	22.5574	0.2471	7.6216	0.2619	0.7219	0.4505	32.273		9.873	540.096	5.917	182.486	6.2717	17.2853	10.7874	772.717		0.1124	1.2605	18.4993	1.6616	0.1011	1.3031	22.938		2.6903	30.1805	442.932	39.7842	2.4212	31.1996	549.208		36.3099	0.019	0.7242	4.371	0.1502	0.0981	41.6725		869.374	0.4555	17.3406
Case 38	2	1	3055.5		0.6246	23.7044	0.2106	6.5179	0.2547	0.7307	0.3929	32.4358		19.0838	724.287	6.436	199.155	7.782	22.3268	12.0063	991.077		0.1654	1.345	19.686	1.4134	0.1665	1.1048	23.8812		5.0552	41.0974	601.506	43.1866	5.0873	33.7578	729.69		36.7409	0.1129	1.3907	2.7916	0.1265	0.0605	41.2231		1122.62	3.4501	42.4922
Case 39	1	1	2055.15		0.8508	20.7631	0.2811	8.3122	0.2579	0.7327	0.6561	31.8539		17.4859	426.713	5.7773	170.828	5.3006	15.0577	13.4847	654.647		0.1504	0.731	13.8393	1.2361	0.0656	1.0978	17.1203		3.0914	15.0225	284.419	25.404	1.3485	22.5622	351.847		36.8049	0.3499	0.94	8.6921	0.2339	0.1276	47.1483		756.396	7.1918	19.3178
Case 40	0	0	2086.67		0.2627	21.5727	0.1994	8.9351	0.283	0.9113	0.7848	32.9489		5.4807	450.152	4.1602	186.446	5.9047	19.0166	16.3755	687.536		0.0499	0.7857	12.6384	1.2679	0.1123	1.519	16.3732		1.042	16.3942	263.721	26.4573	2.3438	31.6962	341.655		35.8233	0.2022	1.3429	7.4892	0.1813	0.1664	45.2052		747.515	4.2189	28.0217
Case 41	0	0	3289.99		0.5435	24.609	0.1888	7.3437	0.3084	0.836	0.7988	34.6282		17.8806	809.634	6.2106	241.607	10.1476	27.5039	26.2817	1139.26		0.1079	1.5376	17.6602	1.2926	0.0968	1.539	22.234		3.5513	50.5858	581.018	42.5254	3.1831	50.6337	731.497		35.7694	0.0363	0.4929	3.9465	0.094	0.0411	40.3802		1176.81	1.1946	16.2159
Case 42			1688.75		0.2483	24.7706	0.1652	9.856	0.4072	0.9607	0.4313	36.8393		4.193	418.314	2.7891	166.444	6.8762	16.2242	7.2843	622.125		0.0563	0.8685	14.4328	1.514	0.0628	2.5463	19.4808		0.9501	14.6677	243.734	25.5682	1.061	43.0012	328.982		33.9301	0.8395	0.7653	4.7524	0.15	0.0656	40.503		572.996	14.177	12.9237
Case 43	1	1	2560.39		0.3857	24.515	0.2379	8.0034	0.3366	0.923	0.6029	35.0046		9.8756	627.679	6.0908	204.919	8.6186	23.6326	15.4369	896.252		0.1391	1.4959	16.1417	1.6028	0.0715	1.6192	21.0702		3.5609	38.2997	413.291	41.0369	1.8304	41.459	539.478		31.6579	0.2208	1.1293	7.3498	0.1809	0.1619	40.7006		810.564	5.6542	28.9151
Case 44	1	1	2338.72		0.5858	28.5951	0.5107	19.8782	0.6826	1.418	0.7204	52.3909		13.7004	668.761	11.9436	464.896	15.9652	33.1638	16.8482	1225.28		0.2514	0.8931	12.3022	1.3001	0.1313	1.6492	16.5272		5.8801	20.8865	287.713	30.4049	3.0701	38.5692	386.524		18.0176	1.3287	1.6089	6.1612	0.2641	0.1265	27.507		421.381	31.0756	37.6265
Case 45	4	2	2601.69		0.7639	25.3993	0.2162	7.6736	0.2597	0.8046	0.7426	35.8599		19.8747	660.81	5.624	199.644	6.7573	20.9331	19.3193	932.963		0.1486	2.1532	18.9518	1.3586	0.1706	1.4513	24.2341		3.8659	56.0191	493.067	35.3452	4.4385	37.7591	630.494		28.131	0.5076	2.0026	5.4754	0.2344	0.1284	36.4794		731.88	13.2051	52.1012
Case 46			2941.31		0.4283	23.923	0.2303	7.2875	0.233	0.6171	0.4419	33.161		12.5965	703.647	6.7745	214.349	6.8523	18.151	12.9974	975.368		0.0988	1.4243	19.2322	1.6715	0.1292	1.2735	23.8295		2.907	41.8923	565.677	49.1654	3.7994	37.4579	700.899		33.2489	0.0736	0.8562	4.7083	0.1183	0.0921	39.0975		977.952	2.1662	25.1824
Case 47	0	0	2662.87		0.6968	22.0539	0.1869	8.4043	0.3047	0.7926	0.7025	33.1418		18.5562	587.267	4.9771	223.797	8.1144	21.106	18.7071	882.525		0.095	1.9154	14.7748	1.5734	0.0906	1.6636	20.1128		2.5293	51.0046	393.433	41.898	2.4138	44.2992	535.578		31.1306	0.2883	1.5117	8.2543	0.2217	0.1668	41.5734		828.97	7.6759	40.2556
Case 48	0	0	2186.63		1.0013	24.0381	0.1572	8.9038	0.2784	0.668	0.4712	35.5181		21.895	525.625	3.4378	194.692	6.088	14.6073	10.3026	776.648		0.0698	1.9212	15.7567	1.3947	0.0628	1.5831	20.7884		1.526	42.0104	344.541	30.4972	1.3737	34.6167	454.565		35.2889	0.1446	0.9116	4.5637	0.1671	0.0666	41.1426		771.638	3.1624	19.9334
Case 49	0	0	3723.85		0.4796	19.7487	0.1822	6.6391	0.3449	0.9661	0.5881	28.9488		17.8585	735.413	6.7865	247.232	12.8438	35.9772	21.9	1078.01		0.1005	1.6646	15.3011	1.378	0.1104	1.7276	20.2822		3.7438	61.9863	569.791	51.3132	4.1121	64.3331	755.28		36.7924	0.0985	0.9507	7.0484	0.1186	0.1074	45.1162		1370.1	3.6697	35.4017
Case 50			3081.5		0.4323	23.9248	0.1888	7.2442	0.3132	0.852	0.4811	33.4365		13.3223	737.243	5.819	223.23	9.6502	26.2538	14.8257	1030.34		0.1042	2.1927	19.667	1.8442	0.0992	1.4327	25.34		3.2105	67.5692	606.039	56.8275	3.0558	44.1482	780.85		29.5052	0.3908	1.1653	6.65	0.1917	0.1309	38.0339		909.2	12.042	35.9098
Case 51	6	2	3760.25		0.4409	22.0456	0.121	7.2993	0.2626	0.8767	0.6953	31.7414		16.5774	828.969	4.5501	274.471	9.8746	32.9669	26.1448	1193.55		0.0822	1.6201	16.1612	1.0637	0.0751	1.5665	20.5689		3.0927	60.9196	607.703	39.9965	2.8222	58.906	773.44		34.6822	0.3616	1.6402	6.3107	0.1989	0.1941	43.3878		1304.14	13.5968	61.6754
Case 52	1	1	2503.43		0.4582	21.0691	0.1719	8.7325	0.3035	0.8361	0.4818	32.053		11.4699	527.45	4.3042	218.612	7.5969	20.9301	12.0624	802.426		0.0632	1.5544	14.8152	1.3875	0.1312	1.3059	19.2574		1.5827	38.9145	370.887	34.734	3.2851	32.6916	482.095		29.9958	0.5941	1.2555	8.1081	0.1493	0.1202	40.223		750.924	14.8738	31.4299
Case 53	0	0	2089.71		0.2768	22.3183	0.1892	9.0634	0.3511	0.9603	0.5749	33.734		5.785	466.388	3.9527	189.399	7.3367	20.0669	12.0137	704.942		0.0626	1.013	13.9662	1.4795	0.064	1.7227	18.3079		1.3072	21.1689	291.852	30.917	1.3383	35.9985	382.581		35.8154	0.1787	1.0951	7.621	0.213	0.1191	45.0424		748.437	3.7348	22.8854
Case 54	0	0	2311.54		0.5196	24.3939	0.1988	8.8771	0.3372	0.8424	0.5691	35.7382		12.0115	563.875	4.5947	205.198	7.7945	19.4734	13.1555	826.102		0.0936	1.3834	17.9025	1.5958	0.0696	1.784	22.8288		2.1633	31.9769	413.823	36.8878	1.6079	41.238	527.697		32.7005	0.0139	0.8081	4.5642	0.1442	0.1075	38.3385		755.885	0.3216	18.6806
Case 55	1	1	2253.14		0.3025	21.8495	0.2242	7.453	0.3023	1.0381	0.5565	31.7261		6.8151	492.3	5.0525	167.927	6.8104	23.389	12.538	714.833		0.1015	1.3569	14.9832	1.152	0.0932	1.6559	19.3426		2.286	30.5726	337.593	25.9561	2.0991	37.3089	435.816		33.691	0.1155	0.9404	9.2088	0.2532	0.26	44.4689		759.105	2.6021	21.1889
Case 56	0	0	2238.61		0.2943	21.4173	0.2125	8.0819	0.3007	0.7607	0.6055	31.6729		6.5879	479.45	4.7563	180.922	6.7326	17.03	13.5539	709.032		0.1033	1.1675	15.4715	1.3967	0.1311	1.4637	19.7339		2.3128	26.1367	346.346	31.2676	2.9348	32.7665	441.764		36.9568	0.1912	1.2021	6.3307	0.2393	0.1147	45.0348		827.317	4.2794	26.9113
Case 57	0	0	2219.62		0.2691	22.7294	0.2695	10.2105	0.4853	1.4332	0.9739	36.3708		5.9733	504.507	5.9813	226.635	10.7712	31.8117	21.6163	807.296		0.1006	0.9968	12.6522	1.4511	0.1022	2.0945	17.3974		2.2325	22.1256	280.832	32.2084	2.2679	46.4899	386.156		31.6314	0.0367	1.2215	8.2514	0.2443	0.1118	41.497		702.098	0.815	27.1123
Case 58	1	1	2501.5		0.4777	22.4269	0.2605	7.3429	0.2484	0.7723	0.4383	31.967		11.9485	561.01	6.5166	183.683	6.2136	19.3196	10.9644	799.655		0.2072	1.001	14.7714	1.2098	0.045	1.0985	18.3329		5.1819	25.0391	369.506	30.2637	1.1266	27.4792	458.597		39.2039	0.0346	0.9437	5.5957	0.1287	0.1158	46.0224		980.685	0.8651	23.6066
Case 59	0	0	1974.74		0.2151	21.4307	0.356	8.8313	0.3154	0.9863	0.5283	32.6631		4.247	423.2	7.0306	174.395	6.229	19.4765	10.4325	645.01		0.1541	0.8446	11.7092	1.1089	0.0572	1.0493	14.9233		3.0428	16.6796	231.226	21.8977	1.1302	20.7202	294.696		42.1224	0.0763	0.9052	6.1313	0.0682	0.0734	49.3768		831.807	1.5069	17.8756
Case 60	4	2	2774.82		0.6449	23.2619	0.1834	8.472	0.2408	0.6836	0.3908	33.8775		17.8945	645.475	5.0901	235.084	6.6819	18.9691	10.8444	940.038		0.0957	1.4088	16.304	1.3452	0.1192	1.1112	20.384		2.6544	39.0914	452.407	37.3282	3.3062	30.8329	565.62		35.0961	0.2431	1.4597	4.9279	0.1823	0.1811	42.09		973.852	6.7447	40.5031
Case 61	2	1	3575.68		0.602	22.7993	0.2133	9.1463	0.2369	0.6097	0.4012	34.0087		21.5249	815.231	7.6271	327.042	8.4695	21.8015	14.3469	1216.04		0.1	1.3796	15.2949	1.2014	0.0483	0.8631	18.8873		3.5762	49.3306	546.896	42.9565	1.7285	30.8626	675.351		35.6131	0.2771	1.4125	5.5019	0.1853	0.1556	43.1455		1273.41	9.908	50.5059
Case 62	0	0	2292.04		0.4956	20.8523	0.2712	7.8206	0.217	0.6695	0.5192	30.8452		11.3594	477.942	6.2154	179.251	4.9735	15.3446	11.8994	706.985		0.1691	1.5239	14.9798	1.5684	0.0697	0.9665	19.2774		3.8756	34.9287	343.342	35.9481	1.5984	22.1521	441.844		39.4586	0.3005	1.3559	4.9603	0.1674	0.1341	46.3768		904.405	6.8887	31.0788
Case 63			2348.31		0.6993	22.199	0.1969	7.372	0.2448	0.7514	0.455	31.9184		16.4215	521.301	4.625	173.118	5.748	17.6442	10.6857	749.543		0.1147	1.4208	17.0867	1.3374	0.1072	1.1392	21.206		2.6941	33.365	401.25	31.4061	2.5172	26.7518	497.984		35.1035	0.3701	1.4197	6.0952	0.2202	0.0933	43.302		824.341	8.691	33.339
Case 64	0	0	2005.54		0.4099	20.4354	0.1937	8.6192	0.2735	0.694	0.5428	31.1686		8.2215	409.84	3.8851	172.862	5.4852	13.9184	10.8851	625.097		0.0895	1.1299	13.7356	1.2896	0.1047	1.1113	17.4607		1.7942	22.6602	275.473	25.8644	2.1007	22.2885	350.181		39.4798	0.0923	0.8986	6.3237	0.2327	0.1849	47.2121		791.783	1.8512	18.0224
Case 65	1	1	4486.36		0.6877	26.1733	0.2584	13	0.47	1.2188	0.6319	42.44		30.8533	1174.23	11.5947	583.225	21.0844	54.6784	28.3477	1904.01		0.0901	0.4257	17.961	1.2584	0.2111	1.5514	21.4976		4.0443	19.098	805.794	56.455	9.4694	69.5991	964.46		24.5312	0.0286	1.4582	6.0861	0.2384	0.1575	32.5001		1100.56	1.2851	65.42
Case 66	0	0	2153.54		0.8184	27.0982	0.7559	22.6068	0.597	1.0662	0.589	53.5314		17.6236	583.571	16.2789	486.848	12.8565	22.9606	12.6836	1152.82		0.3291	0.9096	13.6657	1.2064	0.1063	2.195	18.412		7.0863	19.5887	294.296	25.9802	2.2886	47.27	396.51		19.0075	1.2547	0.7424	3.8645	0.3457	0.0947	25.3096		409.335	27.0215	15.9886
Case 67	0	0	2276.36		0.5864	22.5664	0.1863	8.7903	0.3855	1.2181	0.885	34.618		13.3477	513.691	4.2406	200.099	8.7759	27.7289	20.1458	788.029		0.112	0.9313	13.699	0.9441	0.0693	1.5046	17.2604		2.5501	21.2007	311.839	21.4908	1.5777	34.249	392.908		35.9258	0.5063	1.1343	6.699	0.1493	0.1066	44.5212		817.8	11.5241	25.82
Case 68	0	0	2898.11		0.2873	21.9884	0.2495	10.5726	0.329	1.3879	0.5996	35.4143		8.325	637.247	7.2317	306.406	9.5358	40.2241	17.3763	1026.35		0.0776	1.292	13.3508	1.2667	0.0611	1.5834	17.6315		2.2478	37.444	386.92	36.7111	1.7698	45.8877	510.98		33.3162	0.1704	1.259	7.0999	0.2609	0.1862	42.2926		965.539	4.9393	36.4861
Case 69			2574.14		0.4848	21.2353	0.216	7.5453	0.3319	0.9957	0.8936	31.7025		12.4793	546.626	5.5589	194.227	8.543	25.63	23.0031	816.068		0.1346	1.6616	13.517	1.3423	0.0882	1.5265	18.2702		3.4649	42.7724	347.945	34.5525	2.2698	39.295	470.3		35.9376	0.2255	1.2232	7.4862	0.1934	0.1784	45.2443		925.083	5.8056	31.4862
Case 70			2402.5		0.5042	20.9862	0.1895	8.2614	0.3088	1.222	0.8036	32.2757		12.114	504.194	4.5532	198.479	7.4192	29.3578	19.3059	775.423		0.1125	1.1962	15.111	1.032	0.1015	1.2974	18.8504		2.7024	28.7377	363.041	24.7941	2.4378	31.1693	452.882		34.5601	0.5308	1.9695	7.919	0.2447	0.1381	45.3622		830.307	12.7521	47.3178
Case 71	0	0	2216.42		0.9462	23.2821	0.1241	6.5777	0.2145	0.6205	0.3679	32.1331		20.9726	516.029	2.7513	145.79	4.754	13.7537	8.154	712.204		0.1334	1.603	18.8251	1.2218	0.1042	1.0652	22.9528		2.956	35.5299	417.245	27.0795	2.3095	23.6104	508.73		34.4283	0.2637	1.381	4.3938	0.215	0.1247	40.8066		763.076	5.8453	30.6094
Case 72	0	0	2406.59		0.471	22.2737	0.185	6.7396	0.332	0.9672	0.7026	31.6712		11.3362	536.038	4.4516	162.194	7.9904	23.2756	16.9096	762.196		0.1314	1.9176	16.1654	1.4249	0.096	1.3796	21.115		3.1619	46.1492	389.035	34.2922	2.3109	33.2025	508.152		35.4711	0.1787	0.8878	6.4872	0.1999	0.1617	43.3864		853.644	4.3005	21.3664
Case 73	3	2	3831.4		0.9971	26.1388	0.1913	7.4764	0.2092	0.5113	0.4292	35.9533		38.203	1001.48	7.3276	286.452	8.015	19.5899	16.4457	1377.51		0.1478	2.7027	22.3571	1.5509	0.1235	0.9517	27.8337		5.6636	103.553	856.59	59.4229	4.7302	36.4617	1066.42		26.9563	0.43	1.3909	3.9949	0.1634	0.1504	33.0859		1032.8	16.4751	53.2915
Case 74	4	2	3000.1		0.7029	22.9383	0.205	7.4836	0.2185	0.7792	0.7513	33.0788		21.0867	688.171	6.1504	224.516	6.5566	23.3779	22.5386	992.397		0.1218	1.43	16.4145	1.1526	0.1134	0.7599	19.9921		3.653	42.9	492.451	34.5799	3.4011	22.7965	599.781		33.9016	0.3572	1.3145	7.2711	0.2218	0.1704	43.2366		1017.08	10.7155	39.436
Case 75	0	0	2462.09		0.4505	23.3842	0.2053	7.8564	0.2801	0.8243	0.375	33.3758		11.0914	575.74	5.0535	193.432	6.8962	20.2949	9.2333	821.742		0.1034	1.4581	18.7381	1.4119	0.1011	1.3973	23.2098		2.546	35.8998	461.348	34.7625	2.4883	34.4022	571.447		34.4048	0.2087	0.9779	5.1343	0.2228	0.148	41.0965		847.076	5.1393	24.0771
Case 76			2794.68		0.3417	24.0262	0.3755	14.6211	0.3964	0.9182	0.6233	41.3023		9.5492	671.453	10.4932	408.611	11.0788	25.6611	17.4201	1154.27		0.1199	0.5928	12	1.2084	0.0983	0.9867	15.006		3.35	16.5662	335.36	33.7713	2.747	27.575	419.37		30.3917	0.1319	1.3642	7.1499	0.2901	0.1738	39.5015		849.35	3.685	38.125
Case 77	0	0	2291.33		0.4153	20.1503	0.3322	8.2112	0.2927	0.8756	1.2397	31.5168		9.5148	461.709	7.611	188.145	6.7065	20.062	28.4052	722.154		0.1689	1.1055	12.0532	1.4702	0.5274	1.6875	17.0128		3.8708	25.3317	276.178	33.6882	12.0851	38.6667	389.821		39.5606	0.1283	0.593	6.2474	0.0766	0.0496	46.6555		906.465	2.9391	13.5877
Case 78	3	2	3889.13		1.1358	24.3874	0.2594	8.4193	0.2365	0.586	0.7485	35.7729		44.1723	948.457	10.089	327.436	9.1985	22.7912	29.1119	1391.26		0.1675	1.6726	16.7424	1.0403	0.2575	0.8727	20.7531		6.513	65.0515	651.135	40.4593	10.016	33.9411	807.116		30.7417	0.4592	1.863	5.968	0.2075	0.1481	39.3875		1195.58	17.8599	72.4563
Case 79	0	0	2791.64		0.4471	23.1856	0.2215	7.5381	0.2176	0.4653	0.3698	32.445		12.4803	647.26	6.1848	210.437	6.0746	12.9896	10.3223	905.748		0.1126	2.0166	18.7265	1.9863	0.1297	1.0289	24.0006		3.1443	56.2954	522.777	55.4495	3.621	28.7238	670.011		32.2868	0.2664	1.2107	6.0656	0.2393	0.1688	40.2375		901.333	7.4365	33.7971
Case 80			1957.06		0.6819	21.965	0.2036	7.3007	0.2704	0.6795	0.4657	31.5669		13.3451	429.87	3.9846	142.88	5.2925	13.2992	9.1141	617.785		0.1561	2.2994	16.3161	1.6946	0.0687	1.1383	21.6733		3.0545	45.0013	319.316	33.165	1.3454	22.2781	424.16		35.4863	0.2987	1.3838	5.7921	0.1478	0.0961	43.2048		694.489	5.8459	27.0823
Case 81	0	0	2628.61		0.612	24.8122	0.1993	8.5365	0.2767	0.6898	0.5605	35.687		16.0879	652.216	5.2391	224.39	7.2731	18.133	14.7341	938.073		0.1021	2.6889	17.7199	1.7935	0.1111	1.3016	23.7171		2.6848	70.6808	465.787	47.1444	2.9208	34.2127	623.431		28.0551	0.4593	1.6473	7.0326	0.257	0.1491	37.6004		737.461	12.0738	43.3011
Case 82	5	2	3505.52		0.6759	25.6119	0.1681	8.9965	0.2828	0.9311	0.5828	37.2491		23.6947	897.831	5.893	315.374	9.9129	32.6394	20.4295	1305.77		0.0573	2.0195	17.1639	1.4964	0.0282	1.4419	22.2072		2.0089	70.7952	601.683	52.4553	0.9874	50.5469	778.477		29.6914	0.0845	1.4315	5.3551	0.1166	0.0971	36.7762		1040.84	2.9623	50.1809
Case 83	1	1	3565.06		0.4566	23.6225	0.1015	10.2973	0.3562	1.0943	0.5907	36.5192		16.2784	842.157	3.6197	367.105	12.6992	39.0115	21.0601	1301.93		0.0812	1.6806	16.2599	1.659	0.0517	2.1774	21.9098		2.8958	59.9158	579.675	59.1439	1.8428	77.6243	781.097		30.0872	0.0369	1.2036	6.0527	0.072	0.1071	37.5595		1072.63	1.3163	42.9077
Case 84			2119.7		0.4322	24.256	0.2463	9.3204	0.2989	0.8225	0.4798	35.856		9.1612	514.154	5.2199	197.564	6.3349	17.4343	10.1713	760.04		0.1342	1.2991	15.8219	1.5699	0.1098	1.571	20.5059		2.8453	27.5374	335.377	33.2768	2.3269	33.3006	434.664		33.5616	0.0434	1.3713	5.3134	0.2038	0.2203	40.7138		711.406	0.9196	29.0684
Case 85			2161.41		0.4935	20.7145	0.2183	7.0305	0.2555	0.8558	0.477	30.0451		10.6661	447.725	4.7177	151.959	5.5219	18.498	10.3103	649.398		0.1453	1.6369	14.3448	1.5123	0.0703	0.8446	18.5542		3.1396	35.3795	310.051	32.6873	1.5188	18.2562	401.032		39.9895	0.0533	0.6865	6.5847	0.1744	0.1578	47.6461		864.337	1.153	14.8371
Case 86			2496.35		0.4594	23.3282	0.2567	8.3928	0.2932	0.7456	0.5519	34.0278		11.4694	582.354	6.4086	209.515	7.3183	18.613	13.7767	849.455		0.1373	1.2596	16.3235	1.4481	0.0998	1.443	20.7112		3.4266	31.4436	407.491	36.1502	2.492	36.0219	517.025		34.2431	0.2054	1.0367	6.1387	0.1915	0.1347	41.9502		854.829	5.1283	25.879
Case 87			2347.27		0.3761	23.541	0.1991	7.9159	0.2679	0.7246	0.3275	33.3521		8.828	552.57	4.6725	185.807	6.2884	17.0085	7.6882	782.862		0.0932	1.814	18.9048	1.7457	0.1499	1.4739	24.1814		2.1873	42.5785	443.745	40.9755	3.5185	34.5969	567.602		32.684	0.1653	1.2588	5.2237	0.2277	0.1602	39.7198		767.182	3.88	29.5478
Case 88	1	1	3349.21		0.7969	22.8137	0.2572	8.5803	0.2672	0.6432	0.624	33.9825		26.691	764.078	8.6156	287.373	8.9478	21.5409	20.899	1138.15		0.1551	1.6598	16.1916	1.3806	0.0491	1.229	20.6652		5.1943	55.5902	542.292	46.2396	1.6448	41.1614	692.122		32.3557	0.4315	1.8125	6.0013	0.2145	0.1643	40.9798		1083.66	14.4506	60.7054
Case 89	1	1	3369.53		0.5771	21.3504	0.1779	8.0095	0.2671	0.7556	0.5388	31.6763		19.4441	719.406	5.995	269.882	9.0015	25.4585	18.1548	1067.34		0.1456	1.4622	16.4515	1.5272	0.1523	1.2883	21.0272		4.9067	49.2686	554.339	51.4595	5.1323	43.411	708.517		35.9227	0.1059	0.9775	5.5581	0.2438	0.1868	42.9947		1210.42	3.5672	32.9357
Case 90	2	1	3084.26		0.7657	24.0725	0.2426	7.6441	0.2277	0.7762	0.3562	34.0851		23.6158	742.459	7.4813	235.765	7.0237	23.9415	10.9875	1051.27		0.1262	1.2692	21.2551	1.2251	0.1895	0.7673	24.8325		3.8931	39.1461	655.564	37.7854	5.8449	23.6649	765.899		31.7553	0.225	1.5323	4.1768	0.2065	0.1548	38.0507		979.417	6.9395	47.2609
Case 91	0	0	1578.64		0.3493	25.2264	0.2827	9.7003	0.3152	0.8657	0.5257	37.2654		5.5148	398.234	4.4628	153.133	4.9759	13.6664	8.2986	588.286		0.1301	1.5032	16.6288	1.5721	0.119	2.0186	21.9718		2.0537	23.7297	262.509	24.8177	1.8781	31.8667	346.855		30.9369	0.1784	0.7364	5.7994	0.1782	0.0715	37.9008		488.382	2.8155	11.6255
Case 92	0	0	3680.57		1.0749	25.7072	0.2467	8.7429	0.2497	0.6147	0.3986	37.0348		39.5632	946.171	9.0798	321.791	9.1921	22.6227	14.6724	1363.09		0.1604	1.377	18.0935	1.3968	0.0794	1.1255	22.2327		5.9039	50.6826	665.946	51.4085	2.9238	41.4261	818.291		29.7442	0.353	1.1836	5.8003	0.1675	0.1632	37.4118		1094.76	12.994	43.5617
Case 93	0	0	2194.17		0.2843	23.5171	0.1895	6.965	0.2804	0.8975	0.4412	32.575		6.2379	516.006	4.1585	152.825	6.1515	19.6928	9.6804	714.752		0.0941	1.279	17.9956	1.5849	0.1101	1.6632	22.727		2.0657	28.0641	394.856	34.7749	2.416	36.4927	498.669		35.1374	0.2289	0.8915	5.257	0.1954	0.1133	41.8235		770.976	5.0235	19.5616
Case 94			1740.87		0.7342	23.9686	0.2562	9.4633	0.3955	0.964	0.6448	36.4266		12.7814	417.261	4.4609	164.744	6.8844	16.7815	11.2259	634.139		0.1531	2.179	15.1063	1.4631	0.1061	1.722	20.7296		2.6649	37.9338	262.981	25.4706	1.8464	29.9781	360.875		28.8662	0.4104	1.7193	7.4849	0.3228	0.2416	39.0451		502.522	7.1453	29.9306
Case 95	0	0	3196.67		0.7779	23.6272	0.2479	8.4183	0.1792	0.6444	0.4191	34.3139		24.8655	755.283	7.925	269.104	5.7287	20.5987	13.3978	1096.9		0.1401	1.6952	17.3441	1.6601	0.091	1.0406	21.9711		4.4777	54.1908	554.433	53.0672	2.9106	33.2636	702.342		34.1595	0.0723	1.4559	4.3296	0.159	0.0968	40.2731		1091.97	2.31	46.5389
Case 96	0	0	2494.14		0.6629	21.9675	0.3398	8.3299	0.3806	1.1348	0.5779	33.3933		16.5332	547.899	8.4747	207.76	9.4924	28.3043	14.4126	832.876		0.1963	1.6621	16.3124	1.1239	0.0818	1.8804	21.2569		4.895	41.456	406.854	28.0317	2.0406	46.9	530.177		32.3393	0.6049	1.6179	6.1843	0.1879	0.1259	41.0603		806.587	15.0881	40.3537
Case 97	0	0	2083.07		0.4483	23.7865	0.236	7.7079	0.3272	0.7979	0.4876	33.7913		9.3386	495.489	4.9166	160.56	6.8152	16.62	10.1564	703.896		0.1371	1.8804	18.3061	1.6639	0.1078	1.568	23.6633		2.8551	39.1699	381.33	34.6598	2.2451	32.6633	492.923		31.927	0.2838	0.7482	6.2552	0.2156	0.1092	39.539		665.062	5.9112	15.5859
Case 98	0	0	2614.6		0.3951	22.4681	0.2462	7.591	0.247	0.716	0.4428	32.1062		10.3295	587.451	6.4381	198.475	6.4578	18.7198	11.578	839.449		0.1434	1.2971	16.1577	1.489	0.1304	1.5351	20.7527		3.7506	33.9143	422.46	38.9302	3.4091	40.137	542.602		37.8236	0.0351	0.7287	4.9359	0.1706	0.1	43.7939		988.937	0.9177	19.0524
Case 99	1	1	2548.82		0.4579	22.1935	0.3332	8.7676	0.3223	0.9009	0.8568	33.8323		11.6712	565.671	8.4932	223.471	8.2151	22.9628	21.8394	862.324		0.147	1.0612	15.2203	1.4273	0.0779	2.2873	20.221		3.7468	27.0474	387.938	36.3799	1.9854	58.2986	515.396		33.6024	0.0474	0.7989	7.1179	0.126	0.0836	41.7763		856.464	1.2093	20.3638
Case 100	1	1	2299.28		0.4037	20.889	0.1883	8.1604	0.2721	0.928	0.8319	31.6735		9.2831	480.296	4.3288	187.631	6.2573	21.3366	19.1278	728.261		0.0486	1.032	16.2734	1.4371	0.1777	1.095	20.0638		1.1182	23.7276	374.171	33.0423	4.0848	25.1777	461.322		35.6451	0.2432	1.3127	6.7508	0.1747	0.0864	44.2128		819.579	5.5912	30.1831
Case 101	2	1	2339.75		0.5233	20.907	0.2005	7.6273	0.3033	1.0262	1.7878	32.3754		12.2431	489.173	4.6922	178.461	7.0956	24.0102	41.8294	757.505		0.0847	1.7721	15.1066	1.3797	0.0452	1.3896	19.7779		1.9814	41.462	353.458	32.2819	1.0567	32.5134	462.753		31.4722	0.4902	1.4075	7.1351	0.1411	0.1346	40.7807		736.371	11.4697	32.9316
Case 102	5	2	5235.99		0.8648	25.9589	0.1893	8.18	0.2357	0.653	0.4196	36.5012		45.2792	1359.2	9.9132	428.301	12.3421	34.1899	21.9689	1911.2		0.1034	2.5837	19.4185	1.354	0.057	0.6049	24.1217		5.4149	135.285	1016.75	70.8975	2.9861	31.6745	1263.01		26.0641	0.4695	1.5592	6.5825	0.3501	0.3253	35.3507		1364.71	24.5809	81.6409
Case 103	1	1	2662.33		0.5349	22.4751	0.2089	10.5709	0.3165	0.8278	0.5011	35.4353		14.2419	598.361	5.5621	281.433	8.4258	22.0377	13.3421	943.403		0.0676	1.1471	13.8836	1.1352	0.063	1.0099	17.3064		1.7992	30.5398	369.627	30.2217	1.6779	26.8864	460.752		35.6041	0.0653	1.173	5.686	0.2437	0.1329	42.9049		947.897	1.7385	31.2285
Case 104	4	2	2858.55		0.51	22.1839	0.1997	9.3758	0.2867	0.9464	0.7434	34.2459		14.5795	634.139	5.7087	268.012	8.1944	27.052	21.2505	978.936		0.0532	1.7387	14.905	1.1679	0.0332	0.884	18.7821		1.522	49.7017	426.068	33.3863	0.9477	25.2708	536.897		32.1006	0.4791	1.9115	7.3225	0.1668	0.1296	42.1101		917.613	13.6953	54.6399
Case 105	3	2	2180.17		0.3291	23.0059	0.1366	7.4168	0.3224	1.1516	1.0137	33.3761		7.1741	501.569	2.9788	161.698	7.0285	25.1067	22.1013	727.657		0.0503	1.9284	17.2718	1.3465	0.0724	1.9572	22.6267		1.0963	42.0433	376.555	29.3565	1.5787	42.6714	493.301		30.9498	0.1864	1.434	7.3566	0.2511	0.223	40.4009		674.759	4.0649	31.2629
Case 106	3	2	2139.23		0.1881	21.9163	0.125	9.241	0.4153	1.288	0.8083	33.9821		4.0231	468.84	2.674	197.687	8.8849	27.5535	17.2919	726.954		0.0433	0.8758	12.9322	1.151	0.0442	2.2794	17.3258		0.927	18.7343	276.649	24.6228	0.9448	48.7609	370.639		33.0418	0.25	1.5127	8.7769	0.1617	0.183	43.9262		706.84	5.348	32.361
Case 107	5	2	4454.4		0.8467	23.9018	0.1159	8.6826	0.2329	0.7799	0.5578	35.1177		37.7175	1064.68	5.1643	386.759	10.3758	34.7387	24.8451	1564.28		0.0838	1.441	15.4161	0.9566	0.0818	1.089	19.0683		3.7307	64.1896	686.694	42.6127	3.642	48.5075	849.377		32.3778	0.2942	2.0901	6.6177	0.1811	0.2221	41.7829		1442.24	13.1036	93.0994
Case 108	5	2	3145.65		0.5992	24.0698	0.1778	8.6018	0.2398	0.6709	0.3928	34.7523		18.8497	757.151	5.5939	270.583	7.5439	21.1056	12.3566	1093.18		0.0885	1.8816	16.5097	1.579	0.0802	1.3825	21.5215		2.785	59.1886	519.337	49.6699	2.5218	43.4882	676.99		31.3428	0.2175	2.0752	5.5762	0.2682	0.217	39.6968		985.934	6.8406	65.2771
Case 109	6	2	3510.41		0.4819	22.3928	0.2044	8.7322	0.2592	0.845	0.7611	33.6765		16.9161	786.078	7.1763	306.535	9.0975	29.6616	26.7184	1182.18		0.0695	1.2704	16.5561	1.3401	0.1511	1.1293	20.5165		2.4413	44.5957	581.186	47.0445	5.3046	39.6427	720.215		34.3053	0.24	1.3705	5.8037	0.2196	0.1578	42.0969		1204.26	8.424	48.1098
Case 110	1	1	2480.03		0.4054	21.6962	0.2417	8.7347	0.3518	1.0421	0.7116	33.1835		10.0546	538.072	5.9938	216.622	8.7249	25.8444	17.6486	822.96		0.0799	1.6151	15.4275	1.2771	0.0637	1.5098	19.973		1.9816	40.0541	382.605	31.6737	1.5791	37.4433	495.337		34.2012	0.1411	1.571	6.7213	0.2372	0.1348	43.0066		848.199	3.4988	38.9611
Case 111	3	2	2097.65		0.2011	23.1794	0.1795	9.5154	0.4178	1.3167	0.7181	35.528		4.218	486.223	3.7661	199.6	8.7641	27.6188	15.0643	745.254		0.0776	0.9678	15.1231	1.3948	0.0517	2.8338	20.4488		1.6269	20.3012	317.23	29.2581	1.0846	59.4441	428.945		31.4148	0.0201	1.2046	6.7775	0.1393	0.0862	39.6424		658.974	0.4218	25.2675
Case 112	5	2	2541.17		0.5258	25.0943	0.177	8.1169	0.2799	0.9336	0.5687	35.6962		13.3617	637.688	4.4985	206.265	7.1116	23.7242	14.4521	907.1		0.0682	1.9064	18.7597	1.6333	0.091	1.3422	23.8008		1.7343	48.4448	476.715	41.5043	2.3123	34.107	604.818		28.5994	0.0739	1.7409	5.3038	0.2047	0.1365	36.0592		726.757	1.8788	44.2387
Case 113	5	2	3082.15		0.5035	23.9353	0.1534	8.1941	0.2238	0.703	0.4309	34.1439		15.518	737.721	4.7279	252.555	6.8969	21.6675	13.2799	1052.37		0.082	2.0386	16.7125	1.4019	0.1025	1.1519	21.4895		2.5289	62.8327	515.105	43.2094	3.1579	35.5046	662.338		30.9098	0.4242	1.7642	7.0446	0.2917	0.2154	40.6499		952.686	13.0741	54.3739
Case 114	4	2	2960.99		0.7073	24.3888	0.198	9.2804	0.2862	0.7471	0.4128	36.0207		20.9433	722.15	5.8638	274.792	8.4752	22.1207	12.2244	1066.57		0.0979	2.1533	18.4309	1.4866	0.0731	1.1767	23.4186		2.8989	63.7598	545.738	44.0175	2.1655	34.843	693.422		28.5229	0.1463	1.4255	6.597	0.2147	0.1805	37.0867		844.56	4.3309	42.2079
Case 115	1	1	2777.28		0.7335	23.4379	0.142	8.1458	0.1965	0.6401	0.5769	33.8727		20.3716	650.937	3.9449	226.232	5.4567	17.7761	16.0225	940.741		0.0736	1.8509	22.0251	1.0334	0.1075	1.0884	26.1789		2.043	51.4043	611.7	28.6996	2.9847	30.2289	727.06		29.5527	0.28	1.6409	4.8861	0.1909	0.1469	36.6974		820.761	7.7757	45.5715
Case 116	1	1	2801.68		0.3979	22.3863	0.1969	9.4654	0.2752	0.9963	0.8348	34.5528		11.1485	627.193	5.5151	265.192	7.7109	27.9123	23.3875	968.06		0.0814	0.983	14.2217	1.1075	0.058	1.0701	17.5216		2.2793	27.5402	398.448	31.0285	1.6241	29.9811	490.901		35.1627	0.0928	1.4195	5.7651	0.1546	0.2058	42.8005		985.147	2.5986	39.7708
Case 117	3	2	2313.99		0.5596	22.8371	0.1541	8.9825	0.2886	0.8358	0.7594	34.4171		12.9488	528.449	3.5659	207.854	6.6773	19.3411	17.5717	796.408		0.0471	1.4284	14.3564	0.9358	0.0771	1.2384	18.0832		1.0908	33.0523	332.205	21.6535	1.7849	28.6574	418.444		35.7635	0.2308	1.4282	6.2674	0.2134	0.1762	44.0795		827.562	5.3407	33.0489
Case 118	2	1	2151.48		0.711	24.1547	0.1196	7.9746	0.2442	0.5588	0.3552	34.118		15.2966	519.685	2.5723	171.571	5.254	12.0219	7.6426	734.043		0.1268	2.1994	18.6148	1.6543	0.1421	1.1089	23.8463		2.7284	47.3196	400.493	35.5927	3.0564	23.8586	513.049		30.1921	0.1776	1.2487	6.2004	0.2259	0.2373	38.2821		649.577	3.8213	26.8659
Case 119	1	1	3143.91		0.3803	21.1924	0.1556	7.0989	0.3349	0.9436	0.6574	30.7632		11.9567	666.27	4.8929	223.183	10.5294	29.6673	20.669	967.168		0.0778	1.7065	15.1922	1.3749	0.0518	1.9605	20.3637		2.4463	53.6512	477.631	43.225	1.6276	61.6371	640.218		35.4697	0.221	1.3714	7.3534	0.1927	0.196	44.8042		1115.14	6.9468	43.1162
Case 120	3	2	2463.43		0.3773	23.1941	0.19	9.3898	0.2962	0.8969	0.5661	34.9103		9.2942	571.37	4.6797	231.31	7.2957	22.0938	13.9463	859.99		0.069	1.2168	15.9715	1.4308	0.0642	1.4551	20.2075		1.7008	29.9749	393.445	35.2466	1.5817	35.8465	497.796		33.5707	0.0518	1.1403	5.9338	0.1243	0.1646	40.9855		826.99	1.2756	28.0901
Case 121	1	1	2286.1		0.4422	21.445	0.211	8.4041	0.2984	0.8202	0.6853	32.3063		10.1091	490.255	4.8233	192.128	6.822	18.7518	15.6665	738.556		0.0928	1.3798	14.6928	1.3206	0.0575	1.0178	18.5612		2.1204	31.5429	335.894	30.1899	1.3135	23.2689	424.329		35.8353	0.0768	1.1228	6.9615	0.1557	0.0955	44.2477		819.233	1.7566	25.6674
Case 122	4	2	2316.66		0.8834	23.629	0.2369	8.8395	0.3618	1.0316	0.9277	35.9099		20.4651	547.403	5.4878	204.781	8.3825	23.8982	21.4912	831.909		0.1585	1.4022	13.2674	0.9614	0.0552	1.6142	17.4589		3.6717	32.4853	307.36	22.2734	1.2782	37.3955	404.464		32.8904	0.2703	1.5683	7.7841	0.2951	0.2505	43.0587		761.958	6.2616	36.3326
Case 123	4	2	5935.46		0.993	24.3185	0.2428	7.6331	0.1979	0.5703	0.4543	34.41		58.9412	1443.42	14.4137	453.06	11.7471	33.8488	26.9623	2042.39		0.0621	2.4399	23.2836	1.0204	0.1111	0.8963	27.8135		3.6836	144.821	1381.99	60.5664	6.5972	53.2023	1650.86		26.037	0.746	1.3142	5.5076	0.179	0.1467	33.9304		1545.42	44.2772	78.0016
Case 124	5	2	3450.62		0.7419	24.5119	0.2055	9.0259	0.1958	0.5268	0.6113	35.8191		25.601	845.81	7.0919	311.448	6.7548	18.1781	21.0947	1235.98		0.0866	3.3493	21.6268	1.3437	0.0454	0.6791	27.1308		2.9871	115.572	746.259	46.3642	1.5651	23.4329	936.18		23.1334	1.0255	1.7433	6.7375	0.3413	0.2442	33.2251		798.244	35.3847	60.1551
Case 125	2	1	2977.49		0.3928	21.0725	0.1693	8.0387	0.3038	0.9578	0.7944	31.7291		11.6945	627.431	5.0398	239.351	9.0442	28.517	23.6526	944.731		0.0651	1.5875	16.8775	1.2684	0.0558	1.6205	21.4748		1.938	47.2674	502.526	37.7664	1.6611	48.2497	639.409		33.2291	0.3509	1.4712	7.7641	0.2006	0.192	43.2078		989.392	10.448	43.8035
Case 126	5	2	3610.52		0.4855	21.6516	0.1797	8.9904	0.2878	0.9644	0.7466	33.3059		17.5287	781.735	6.4872	324.599	10.3922	34.8205	26.9566	1202.52		0.0737	1.3931	14.814	0.9745	0.0661	1.6622	18.9836		2.6603	50.2978	534.864	35.1856	2.3863	60.0155	685.409		35.1681	0.1968	1.5949	6.8555	0.1735	0.2218	44.2107		1269.75	7.1068	57.583
Case 127	3	2	2656.25		0.7786	24.3179	0.1831	8.8173	0.2456	0.6645	0.423	35.4299		20.6803	645.943	4.863	234.21	6.523	17.6511	11.2363	941.107		0.0823	2.2134	18.6568	1.3344	0.1225	1.037	23.4464		2.1867	58.7927	495.572	35.4451	3.2543	27.5454	622.796		30.3524	0.2696	1.4299	5.3262	0.2354	0.1697	37.7831		806.236	7.1606	37.9804
Case 128	4	2	4194.47		0.6115	24.126	0.1181	8.7048	0.2581	0.8985	0.6697	35.3868		25.6477	1011.96	4.9545	365.121	10.8272	37.6887	28.0905	1484.29		0.0761	1.598	17.5655	0.9515	0.0815	1.1852	21.4579		3.1931	67.0269	736.779	39.9122	3.4189	49.7137	900.044		32.5978	0.2547	1.3168	5.4287	0.1662	0.1682	39.9324		1367.3	10.6853	55.2321
Case 129	4	2	2002.79		0.5983	21.8036	0.2164	8.775	0.3431	0.9596	0.6264	33.3224		11.9817	436.68	4.3336	175.745	6.8715	19.2187	12.5464	667.377		0.1068	1.0563	14.2807	1.2632	0.0707	1.5598	18.3374		2.1389	21.1548	286.012	25.2994	1.4151	31.2387	367.259		34.9008	0.0991	1.4777	7.9283	0.2645	0.2854	44.9558		698.991	1.9841	29.5955
Case 130	5	2	3007.3		0.7754	24.2381	0.1688	8.6973	0.2667	0.7377	0.4321	35.3161		23.3199	728.913	5.0749	261.553	8.0217	22.1837	12.9948	1062.06		0.1159	1.7347	18.8078	1.1111	0.0697	1.1554	22.9946		3.4856	52.1678	565.606	33.4132	2.0959	34.7478	691.517		31.732	0.2718	1.1243	4.8804	0.2928	0.2192	38.5205		954.276	8.1742	33.8109
[truncated: 18 more columns]
